# Supplementary material for: Resource Limitation, Controphic Ostracod Density and Larval Mosquito Development
Source: PubMed Central journal article supplement (PMC4641740; doi:10.1371/journal.pone.0142472), 2015-11-11
Supplement: pone.0142472.s001.pdf [file pone.0142472.s001.pdf]

| <b>Treatment</b>           | <b>Development</b> |            | <b>Survival</b> |            |
|----------------------------|--------------------|------------|-----------------|------------|
| <b>Competition</b>         | <b>Mean</b>        | <b>Max</b> | <b>Mean</b>     | <b>Max</b> |
| <b>0</b>                   | 29.2               | 37         | 71.3            | 100        |
| <b>150</b>                 | 24.1               | 33         | 60.8            | 92         |
| <b>300</b>                 | 24.6               | 38         | 61.2            | 80         |
| <b>600</b>                 | 29.8               | 39         | 72.6            | 84.2       |
| <b>Resource Limitation</b> | <b>Mean</b>        | <b>Max</b> | <b>Mean</b>     | <b>Max</b> |
| <b>0.6</b>                 | 19.3               | 21         | 96.1            | 100        |
| <b>0.4</b>                 | 25.8               | 37         | 86.6            | 100        |
| <b>0.2</b>                 | 36.2               | 37         | 77.4            | 91.7       |
| <b>0.1</b>                 | 57.3               | 70         | 61.5            | 68.4       |
